# Supplementary material for: Achieving two-photon fluorescence bioimaging and photodynamic therapy for D–A conjugated polymers through manipulating twisted intramolecular charge transfer
Source: Royal Society of Chemistry journal article supplement (doi:10.1039/d3py01093g), 2023-01-01
Supplement: d3py01093g1.pdf [file d3py01093g1.pdf]

## Supporting information

# Achieving of Two-Photon Fluorescence Bioimaging and Photodynamic Therapy for D-A Conjugated Polymers through Manipulating Twisted Intramolecular Charge Transfer

Liwen Hu,<sup>a,b,1</sup> Shengzu Liao,<sup>a,1</sup> Tianze Hu,<sup>a</sup> Peiling Chen,<sup>a</sup> Chunxiao Wang,<sup>c</sup> Ting Guo,<sup>a,\*</sup> Renqiang Yang,<sup>b</sup> Lei Ying<sup>a,d,\*</sup>

<sup>a</sup>*Institute of Polymer Optoelectronic Materials and Devices, State Key Laboratory of Luminescent Materials and Devices, South China University of Technology, Guangzhou 510640, China*

<sup>b</sup>*Key Laboratory of Optoelectronic Chemical Materials and Devices (Ministry of Education), Flexible Display Materials and Technology Co-Innovation Centre of Hubei Province, School of Optoelectronic Materials & Technology, Jiangnan University, Wuhan 430056, China*

<sup>c</sup>*State Key Laboratory of Ophthalmology, Zhongshan Ophthalmic Center, Sun Yat-sen University, Guangzhou 510060, China*

<sup>d</sup>*South China Institute of Collaborative Innovation, Dongguan 523808, China*

Correspondence to: Ting Guo (E-mail: [mstguo@scut.edu.cn](mailto:mstguo@scut.edu.cn)), Lei Ying (E-mail: [msleiying@scut.cn](mailto:msleiying@scut.cn))

L.W. Hu and S. Z. Liao contributed equally to the work

## Materials

3,7-dibromo-2,8-dioctyldibenzothiophene-*S,S*-dioxide (RSO-Br<sub>2</sub>), 3,7-dibromo-9,9-dioctylfluorene[2,3-*b*]benzo[*d*]thiophene-*S,S*-dioxide (BTOF-Br<sub>2</sub>), 2,10-dibromo-9,9-dioctylfluorenebis[2,3-*b*;6,7-*b*]-benzo[*d*]thiophene-*S,S*-dioxide (FBTO-Br<sub>2</sub>) were purchased from Volt-Amp Optoelectronics Tech. Co., Ltd, Dongguan, China., and used without further purification.

N<sup>1</sup>,N<sup>4</sup>-bis(4-octylphenyl)-N<sup>1</sup>,N<sup>4</sup>-diphenylbenzene-1,4-diamine(M1), N<sup>1</sup>,N<sup>4</sup>-bis(4-bromophenyl)-N<sup>1</sup>,N<sup>4</sup>-bis(4-octylphenyl)benzene-1,4-diamine(M2), N<sup>1</sup>,N<sup>4</sup>-bis(4-octylphenyl)-N<sup>1</sup>,N<sup>4</sup>-bis(4-(4,4,5,5-tetramethyl-1,3,2-dioxaborolan-2-yl) phenyl) benzene-1,4-diamine(M3) were synthesized according to the literatures.<sup>1,2</sup> Unless specified elsewhere, all reagents and starting materials were of commercial grade and used as received. Toluene for Suzuki coupling polycondensation was dealt with concentrated sulfuric acid (H<sub>2</sub>SO<sub>4</sub>) several times, dried by anhydrous MgSO<sub>4</sub>, and further purified by atmospheric distillation under an atmosphere of dry argon.

Synthesis of M3: A mixture of M2 (2.38 g, 3.0 mmol), bis(pinacolato)diboron (1.90 g, 7.5 mmol), [1,1'-Bis(diphenylphosphino)ferrocene]dichloropalladium(II) (Pd(dppf)Cl<sub>2</sub>, 109.7 mg, 0.15 mmol), potassium acetate (1.47 g, 15 mmol) were stirred in dioxane (50 mL). The reaction mixture was kept at 90 °C for 12 h under an argon atmosphere. When cooled down to room temperature, it was sequentially diluted with dichloromethane, washed with water and dried over MgSO<sub>4</sub>. After solvent removal, the residue was purified by silica gel column chromatography (petroleum ether/dichloromethane = 5/1, v/v) to afford M3 as a white solid (1.97 g, yield: 74%).  
<sup>1</sup>H NMR (500 MHz, D<sub>6</sub>-Benzene, ppm) δ: 7.26-7.19 (m, 8H), 7.12 (t, 4H), 7.09 (s, 4H), 7.05 (d, 4H), 6.88 (d, 2H), 2.55 (t, 4H), 1.62 (m, 4H), 1.40-1.25 (m, 20H), 0.95 (t, 6H).  
MS (MALDI-TOF): m/z: 889.32; elemental analysis calcd (%) for C<sub>58</sub>H<sub>78</sub>N<sub>8</sub>B<sub>2</sub>N<sub>2</sub>O<sub>4</sub>:

78.37, H 8.85, N 3.15; found: C 78.13, H 8.56, N 2.97.

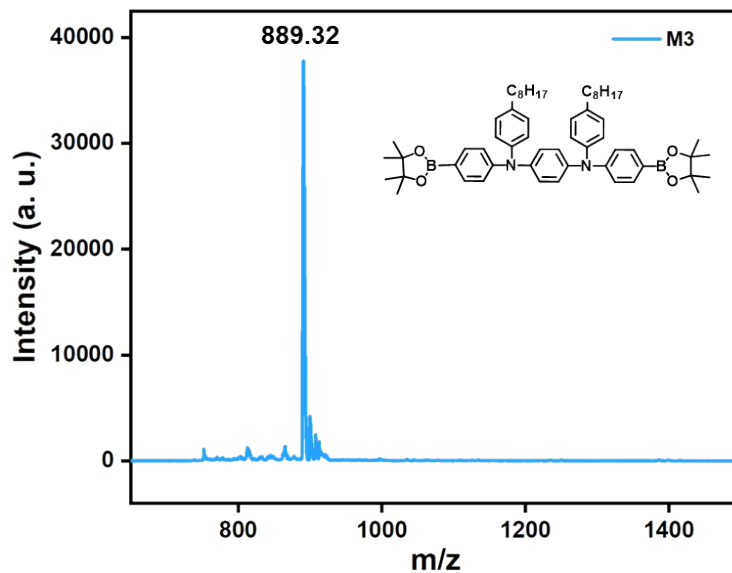

**Figure S1** Matrix-assisted laser desorption/ionization time-of-flight (MALDI-TOF) spectrum of compound M3. The inset is its chemical structure.

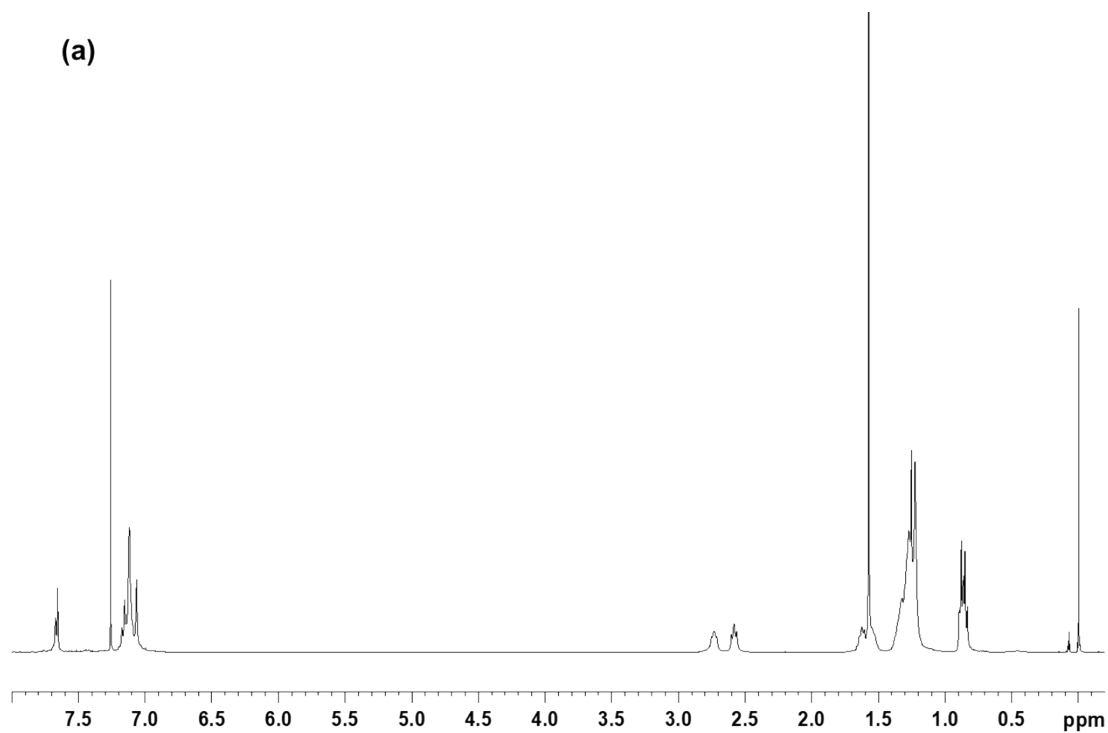

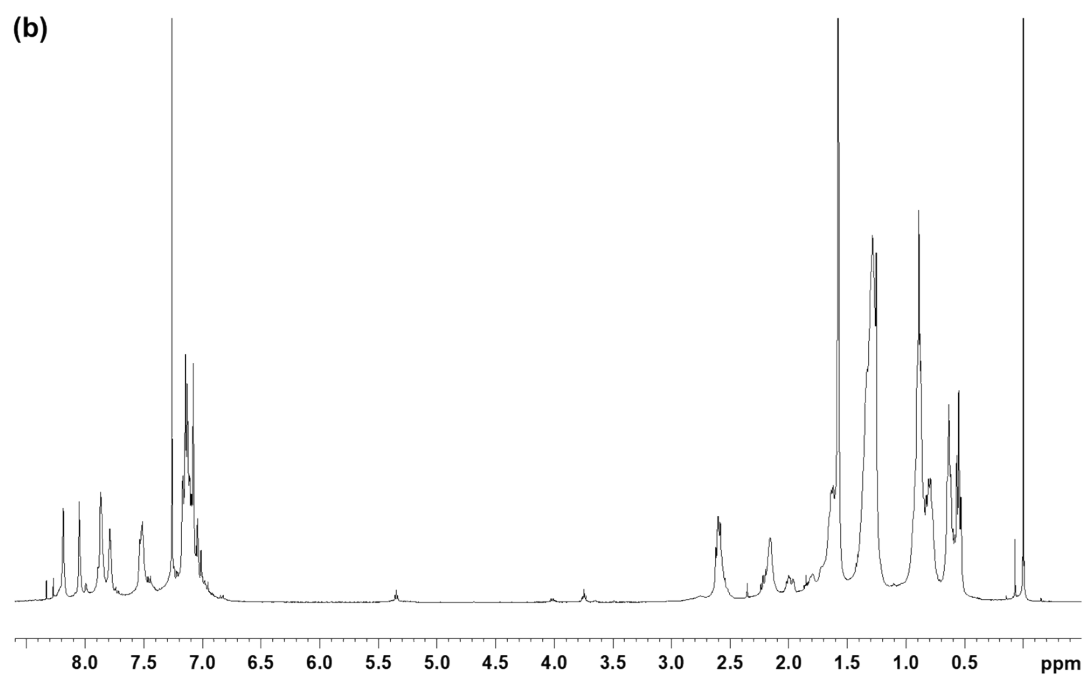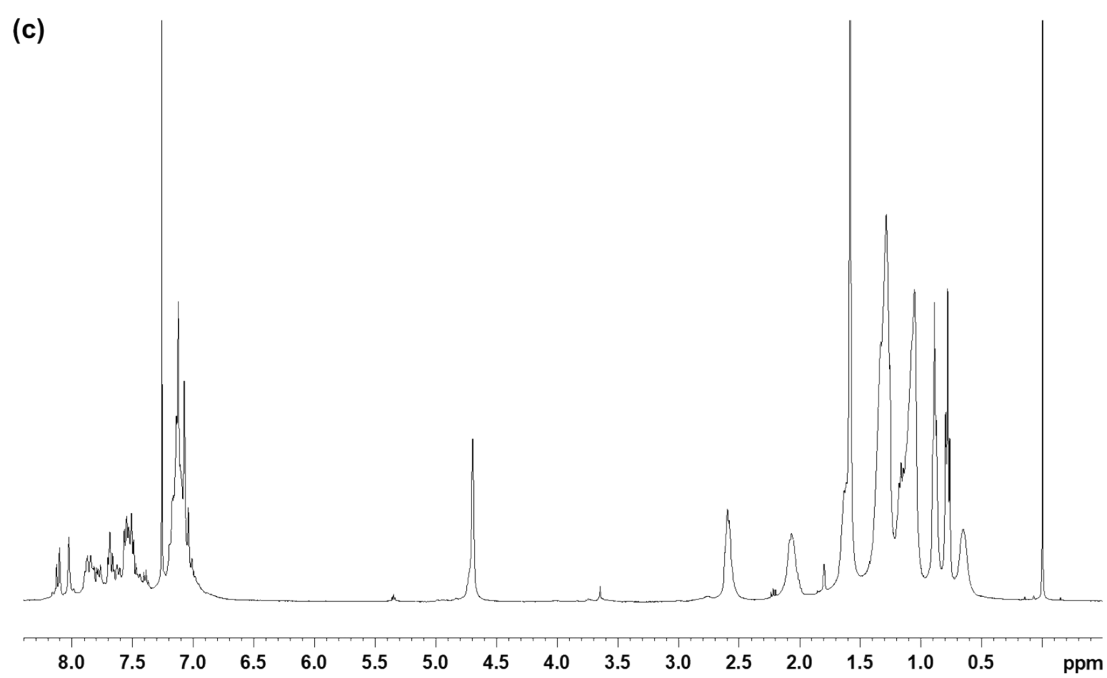

**Figure S2.** <sup>1</sup>H NMR spectra of PDA3 (a), PDA5 (b) and PDA7 (c).

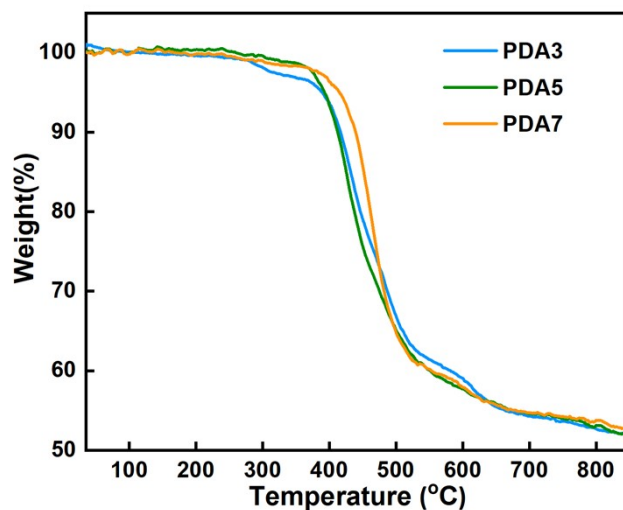

**Figure S3.** Thermogravimetric analysis (TGA) spectra of polymers PDAs.

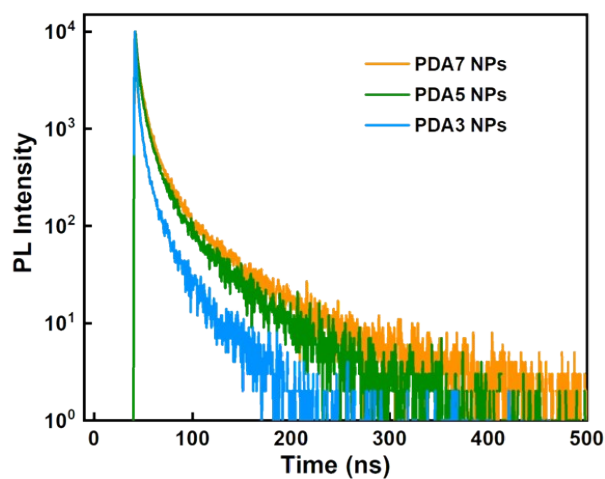

**Figure S4.** Time-resolved fluorescence decay curve of polymers PDAs in pure film state at room temperature.

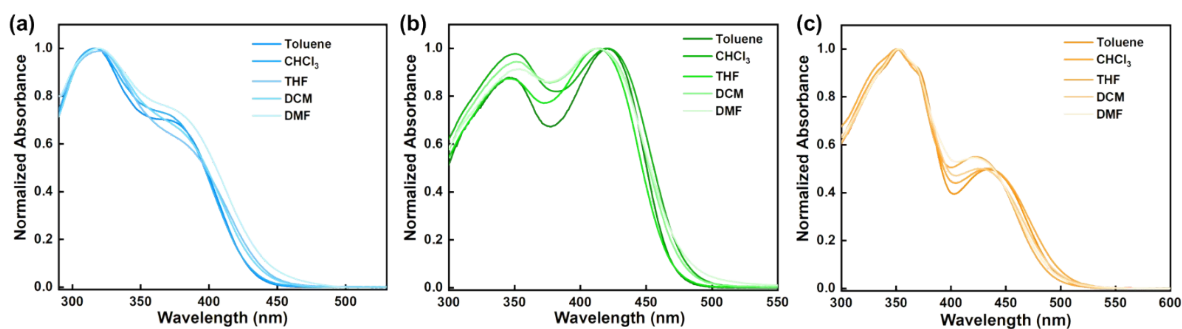

**Figure S5.** UV-vis absorption spectra of PDA3 (a), PDA5 (b) and PDA7 (c) in various

solvents.

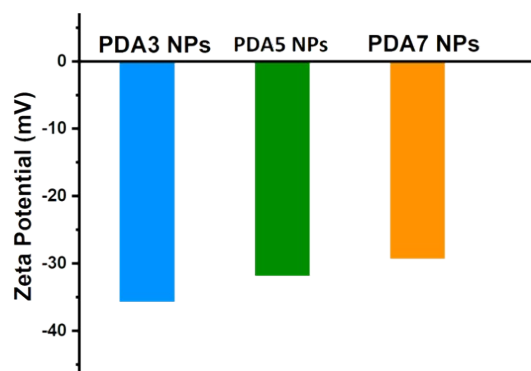

**Figure S6.** The zeta potentials of PDAs NPs in ultra-pure water.

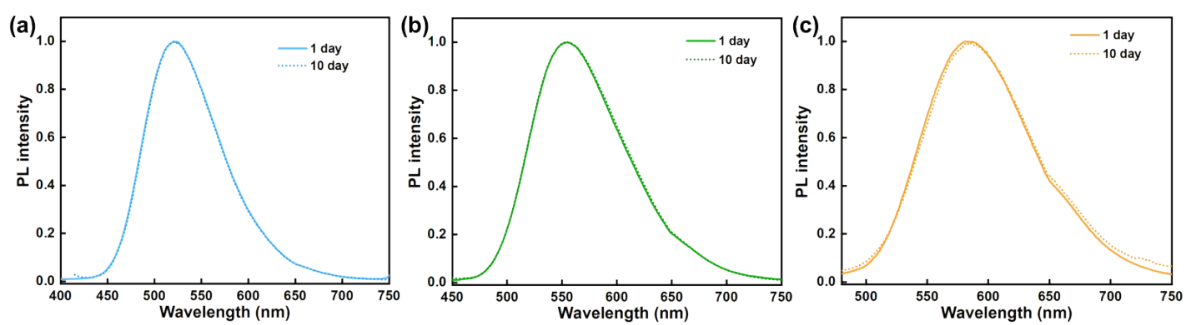

**Figure S7.** PL spectra of PDA3 NPs (a), PDA5 NPs (b) and PDA7 NPs(c).

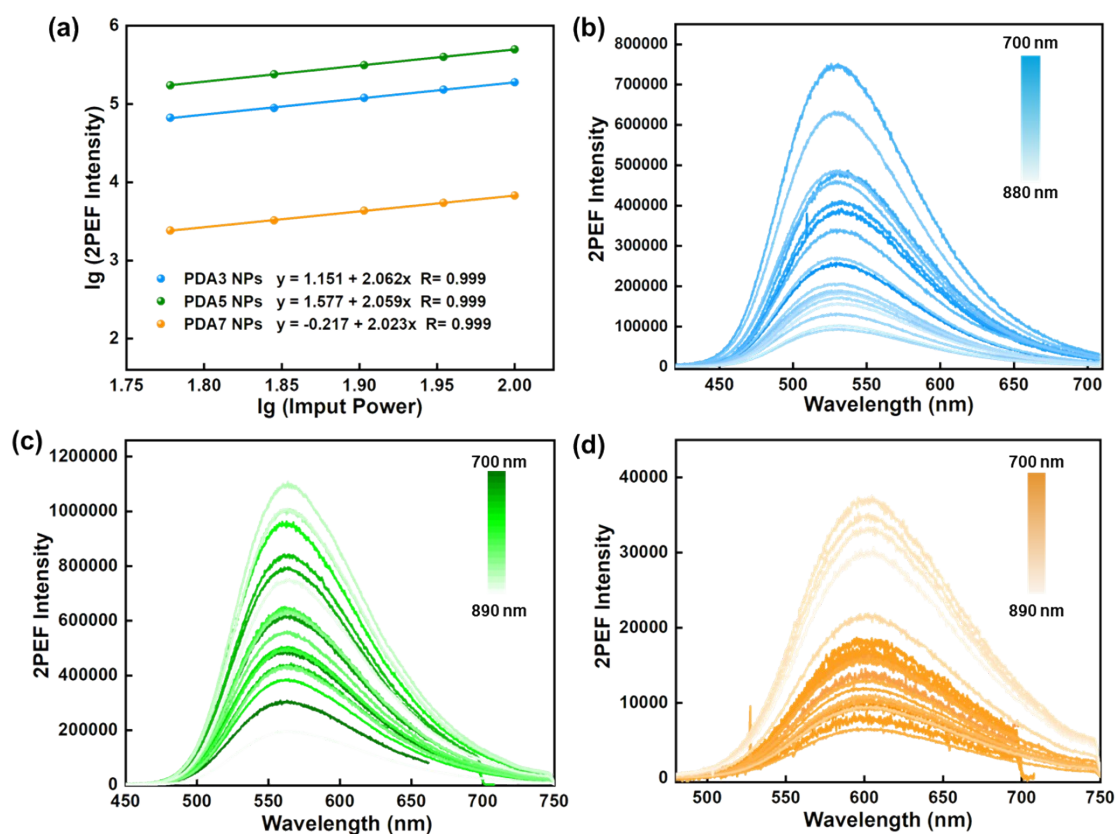

**Figure S8.** (a) The log-log plot of laser excitation power against TPEF emission intensities at 800 nm, and PL spectra of PDA3 NPs (b), PDA5 NPs (c) and PDA7 NPs (d).

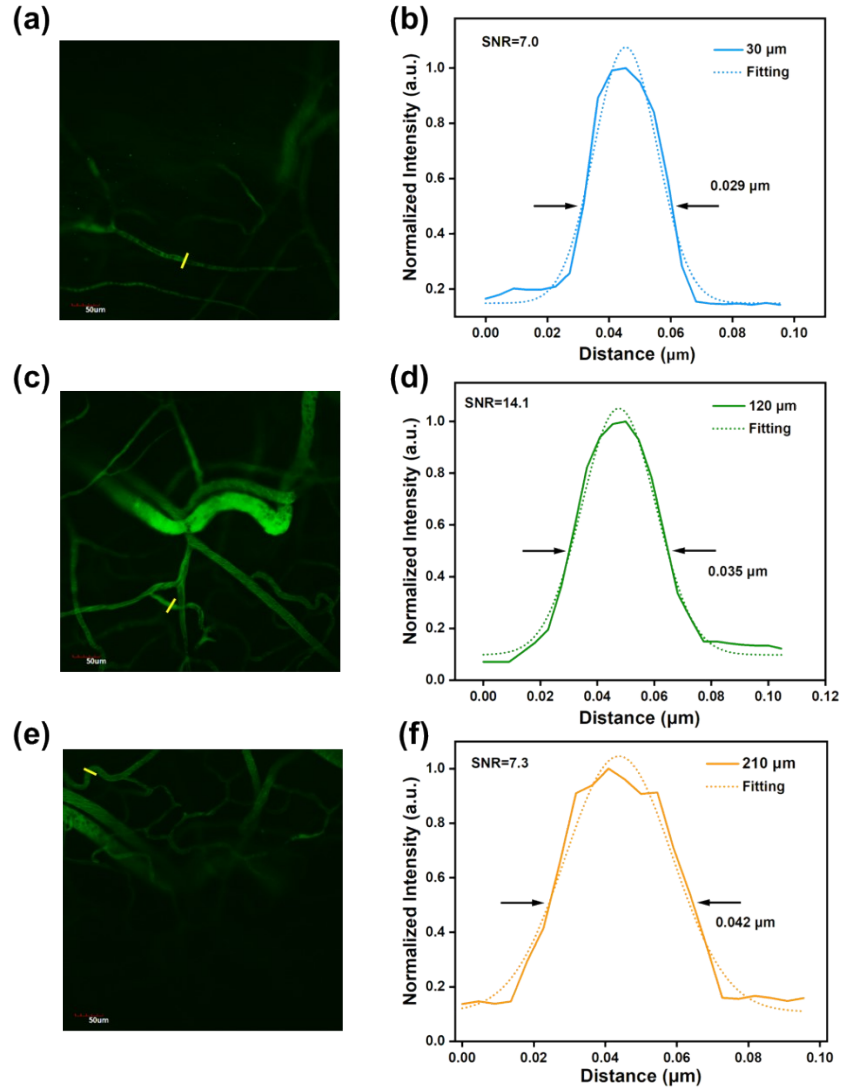

**Figure S9.** Signal-to-noise ratio (SNR) of two-photon bladder vasculature images along the solid yellow line at the depth of 30  $\mu\text{m}$  (a, b), 120  $\mu\text{m}$  (c, d) and 210  $\mu\text{m}$  (e, f) measured from the two-photon fluorescence intensity line profiles across the blood vessels.

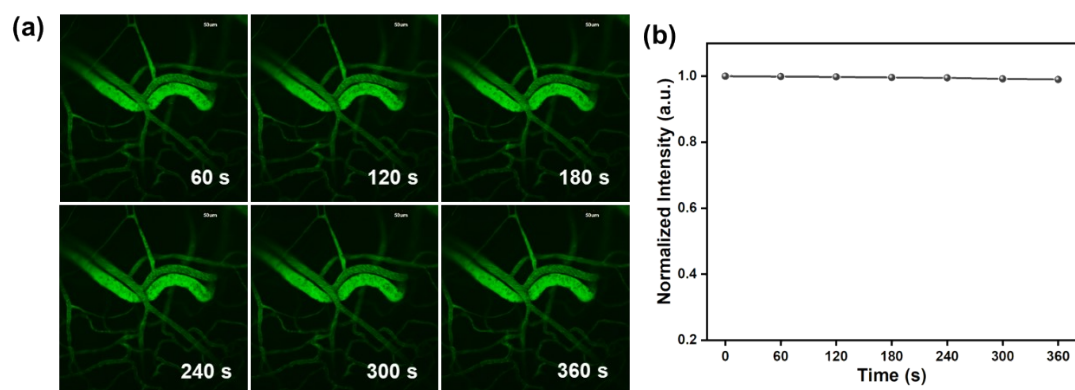

**Figure S10.** (a) Real-time tracing the blood flow in mice bladder in presence of PDA5 NPs (2 mg/kg, 250  $\mu$ L solutions per mouse) upon two-photon excitation ( $\lambda_{\text{ex}}$ =840 nm;  $\lambda_{\text{em}}$ =500–550 nm). Scale bar: 50  $\mu$ m. (b) The fluorescence intensity changes of two-photon fluorescence imaging at different times.

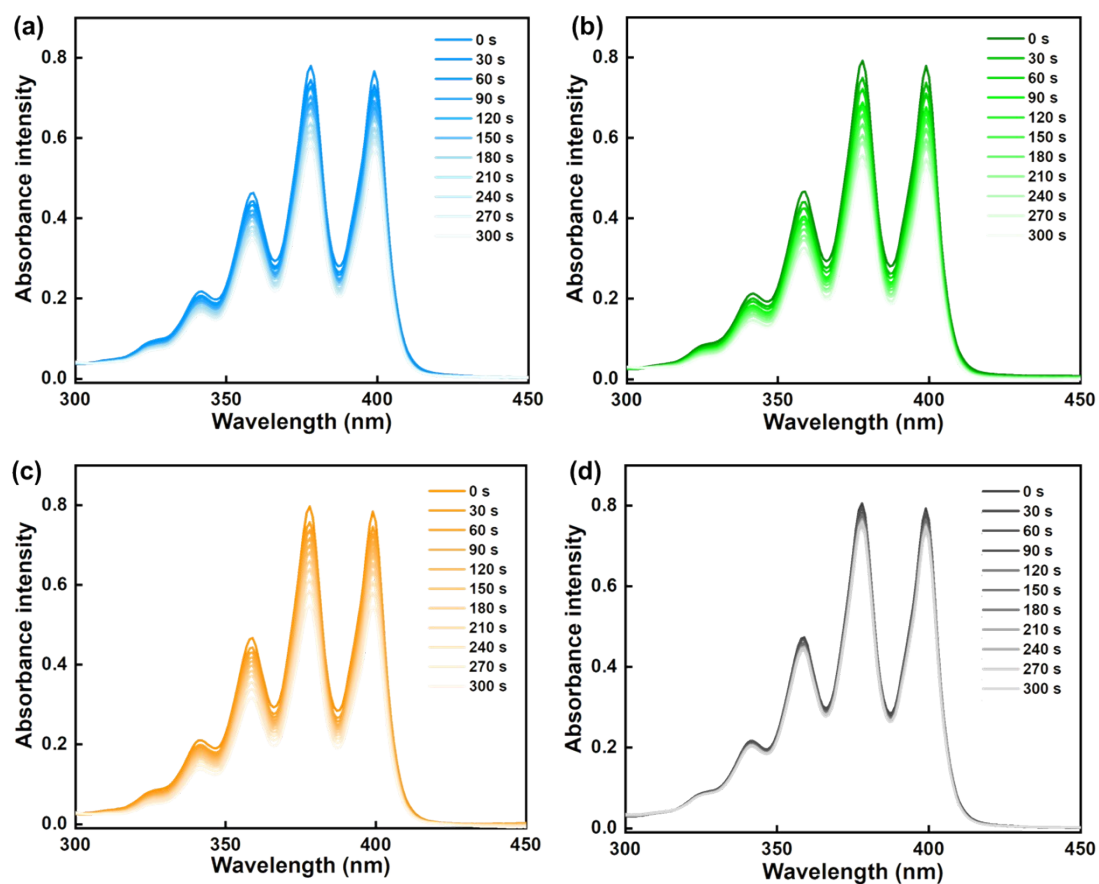

**Figure S11.** Photo-oxidation of ABDA by singlet oxygen generated upon white light

irradiation (400–780 nm, 50 mW cm<sup>-2</sup>) from PDA3 NPs (a), PDA5 NPs (b), PDA7 NPs (c) in water and pure water (d).

## References

1. J. Slota, E. Elmalem, G. Tu, B. Watts, J. Fang, P. Oberhumer, et al. *Macromolecules* 2012, **45**, 1468.
2. G. Tu, S. Massip, P. Oberhumer, X. He, R. Friend, N. Greenham, et al. *J. Mater. Chem.*, 2010, **20**, 9231.
